# Supplementary material
Source: PubMed Central journal article supplement (PMC3171277)
Supplement: NIHMS67302-supplement-1.pdf [file NIHMS67302-supplement-1.pdf]

## Supplementary Figure 1.

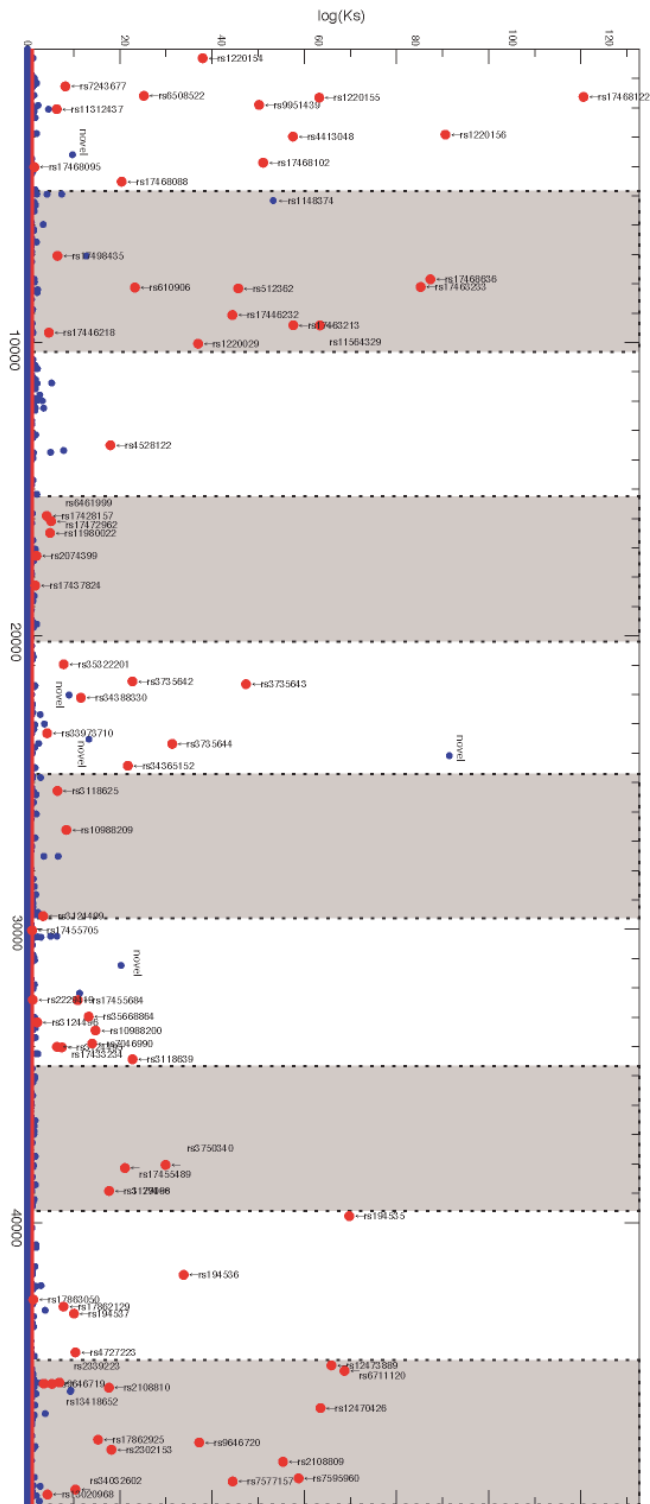

**Supplemental Figure 1. Library B polymorphism discovery.** Similar to Figure 4, variant discovery plot for Library B. As with Library A, inspection of traces from NCBI Trace Archive confirmed polymorphic bases that were previously not annotated.

## Supplementary Figure 2

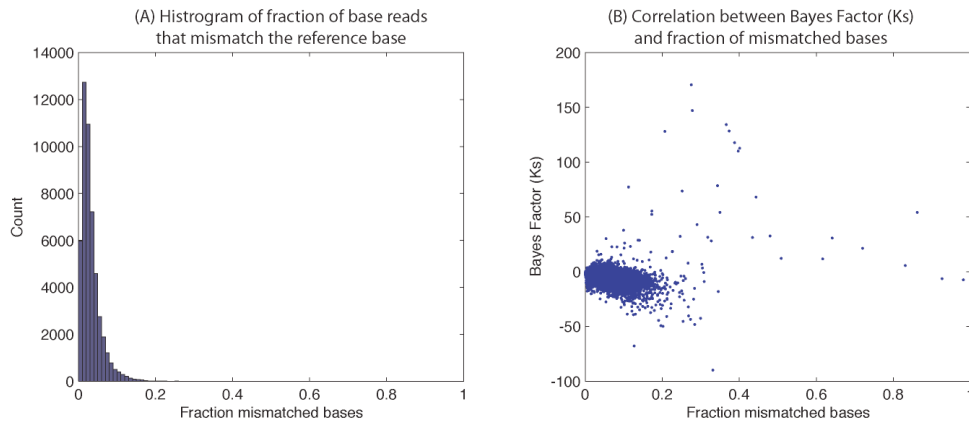

**Supplementary Figure 2. Bayes factors vs. non-reference bases alignments.** (A) A histogram of the fraction of mismatches at each base indicating that a substantial percentage of bases have 15% of the aligned bases disagreeing with the reference base (B.) Scatterplot of  $K_s$  vs. fraction of mismatched. The lack of a positive correlation indicates that most bases favor the model of a binomial distribution even as the fraction of mismatched bases increases. Taken together, these data suggest that most bases sample error, as expected, from a binomial distribution across individuals. Those bases that do not are possible polymorphisms.

**Supplementary Table 1**

| Region #  | Amplicon Primer Sequence | Region (Build 36.1)       |
|-----------|--------------------------|---------------------------|
| Region 1  | Gagatgggtctcctgagtgc     | chr2:234189304+234194258  |
|           | Aaccaactgcatgcttttc      |                           |
| Region 2  | Ccagccaaactgacgtacc      | chr7:113839924+113844896  |
|           | Aacagcccaattcaactgc      |                           |
| Region 3  | gaccaaggaaacaaccaacc     | chr20:33747673-33752665   |
|           | caggaaagcccacatacacc     |                           |
| Region 4  | ctaactcagcggctttgtcc     | chr2:220085623+220090673  |
|           | tcacgtccttttgagacc       |                           |
| Region 5  | gggagctcacgatcaagg       | chr11:130743490+130748475 |
|           | caggaaagcagcagcttagg     |                           |
| Region 6  | gctgggtgttgatattgc       | chr1:149678673-149683603  |
|           | cagtaggcaaggacacatgc     |                           |
| Region 7  | taacagtgggctgaaaagc      | chr5:142043190-142048159  |
|           | ctgggagtctccaggtagc      |                           |
| Region 8  | gttgaaccagggacaatgg      | chr5:141971045-141976067  |
|           | ctcctcacctgcagaacc       |                           |
| Region 9  | gccatgggagttaacagagg     | chr7:126531683-126536662  |
|           | ttgctaccattgccattcc      |                           |
| Region 10 | tggccagttttgtttcagg      | chr11:116250173-116255189 |
|           | tattgggacgaaggattgc      |                           |
| Region 11 | agtagggtagctggatgc       | chr13:112347206+112352113 |
|           | ccgcatgactttgtttgg       |                           |
| Region 12 | gacctgtgatctgcctcc       | chr16:26053412+26058370   |
|           | gaggggctcctaaagtgtgc     |                           |
| Region 13 | atggagttttgctttgttgc     | chr11:63970822+63975969   |
|           | agttgtccctgtggctatgg     |                           |
| Region 14 | tcagtggctgtactcatgc      | chr16:41060-46001         |
|           | aggacacctggggattacg      |                           |

**Supplementary Table 1. Primers.** Primers for amplification of targeted regions within Library A.

**Supplementary Table 2.**

| Encode Regions | Multiplex Pool | Chr | Physical Position Region (36.1) | Region Features                                         |
|----------------|----------------|-----|---------------------------------|---------------------------------------------------------|
| ENr231         | A,B            | 1   | 149678673-149683603             | Moderate non-exonic conservation, High Gene density     |
| ENr331         | A              | 2   | 220085623-220090673             | High-exonic conservation, High Gene density             |
| ENr131         | A,B            | 2   | 234189304-234194258             | Low-exonic conservation, High Gene density              |
| ENr212         | A              | 5   | 141971045-141976067             | Moderate non-exonic conservation, Moderate Gene density |
| ENr212         | A              | 5   | 142043190-142048159             | Moderate non-exonic conservation, Moderate Gene density |
| ENm014         | A              | 7   | 126531683-126536662             | 7q31.33                                                 |
| ENm017         | B              | 7   | 127008375-127012881             | 7q32.1                                                  |
| ENm017         | B              | 7   | 127013024-127018100             | 7q32.1                                                  |
| ENm017         | B              | 7   | 127016306-127021248             | 7q32.1                                                  |
| ENm010         | B              | 7   | 27246985-27251931               | HOXA Cluster                                            |
| ENm012         | B              | 7   | 89709475-89714560               | FOXP2                                                   |
| ENr335         | B              | 9   | 130810649-130815588             | High-exonic conservation, High Gene density             |
| ENr335         | B              | 9   | 130908740-130913660             | High-exonic conservation, High Gene density             |
| ENm003         | A              | 11  | 116250173-116255189             | Apo_cluster                                             |
| ENr312         | A              | 11  | 130743490-130748475             | High-exonic conservation, Low Gene density              |
| ENr123         | B              | 12  | 38507675-38512629               | Low-exonic conservation, High Gene density              |
| ENr123         | B              | 12  | 38783227-38788147               | Low-exonic conservation, High Gene density              |
| ENr123         | B              | 12  | 38903255-38908283               | Low-exonic conservation, High Gene density              |
| ENr132         | A              | 13  | 112347206-112352113             | Low-exonic conservation, High Gene density              |
| ENr213         | B              | 18  | 23783347-23788366               | Moderate-exonic conservation, Low gene density          |
| ENr213         | B              | 18  | 23808628-23813466               | Moderate-exonic conservation, Low gene density          |
| ENr333         | A              | 20  | 33747673-33752665               | High-exonic conservation, High Gene density             |

**Supplementary Table 2. Selected Regions.** Two different indexed pools were sequenced across a series of runs (referred to as multiplex Library A and B). The ENCODE region name, and key ENCODE attributes are listed.

### Supplementary Table 3

| Phos | 5'-3' index | Sequence                                                             | 5'-3' index |
|------|-------------|----------------------------------------------------------------------|-------------|
| P-   | TTT TTA     | GATCGGAAGAGCTCGTATGCCGCTTTCTGCTTG<br>ACACTCTTCCCTACACGACGCTCTCCGATCT | AAA AAT     |
| P-   | GGT TGA     | GATCGGAAGAGCTCGTATGCCGCTTTCTGCTTG<br>ACACTCTTCCCTACACGACGCTCTCCGATCT | CAA CCT     |
| P-   | CCT TCA     | GATCGGAAGAGCTCGTATGCCGCTTTCTGCTTG<br>ACACTCTTCCCTACACGACGCTCTCCGATCT | GAA GGT     |
| P-   | AAT TAA     | GATCGGAAGAGCTCGTATGCCGCTTTCTGCTTG<br>ACACTCTTCCCTACACGACGCTCTCCGATCT | TAA TTT     |
| P-   | GTG TGA     | GATCGGAAGAGCTCGTATGCCGCTTTCTGCTTG<br>ACACTCTTCCCTACACGACGCTCTCCGATCT | CAC ACT     |
| P-   | TGG TTA     | GATCGGAAGAGCTCGTATGCCGCTTTCTGCTTG<br>ACACTCTTCCCTACACGACGCTCTCCGATCT | AAC CAT     |
| P-   | ACG TAA     | GATCGGAAGAGCTCGTATGCCGCTTTCTGCTTG<br>ACACTCTTCCCTACACGACGCTCTCCGATCT | TAC GTT     |
| P-   | CAG TCA     | GATCGGAAGAGCTCGTATGCCGCTTTCTGCTTG<br>ACACTCTTCCCTACACGACGCTCTCCGATCT | GAC TGT     |
| P-   | CTC TCA     | GATCGGAAGAGCTCGTATGCCGCTTTCTGCTTG<br>ACACTCTTCCCTACACGACGCTCTCCGATCT | GAG AGT     |
| P-   | AGC TAA     | GATCGGAAGAGCTCGTATGCCGCTTTCTGCTTG<br>ACACTCTTCCCTACACGACGCTCTCCGATCT | TAG CTT     |
| P-   | TCC TTA     | GATCGGAAGAGCTCGTATGCCGCTTTCTGCTTG<br>ACACTCTTCCCTACACGACGCTCTCCGATCT | AAG GAT     |
| P-   | GAC TGA     | GATCGGAAGAGCTCGTATGCCGCTTTCTGCTTG<br>ACACTCTTCCCTACACGACGCTCTCCGATCT | CAG TCT     |
| P-   | ATA TAA     | GATCGGAAGAGCTCGTATGCCGCTTTCTGCTTG<br>ACACTCTTCCCTACACGACGCTCTCCGATCT | TAT ATT     |
| P-   | CGA TCA     | GATCGGAAGAGCTCGTATGCCGCTTTCTGCTTG<br>ACACTCTTCCCTACACGACGCTCTCCGATCT | GAT CGT     |
| P-   | GCA TGA     | GATCGGAAGAGCTCGTATGCCGCTTTCTGCTTG<br>ACACTCTTCCCTACACGACGCTCTCCGATCT | CAT GCT     |
| P-   | TAA TTA     | GATCGGAAGAGCTCGTATGCCGCTTTCTGCTTG<br>ACACTCTTCCCTACACGACGCTCTCCGATCT | AAT TAT     |
| P-   | GTT GGA     | GATCGGAAGAGCTCGTATGCCGCTTTCTGCTTG<br>ACACTCTTCCCTACACGACGCTCTCCGATCT | CCA ACT     |
| P-   | TGT GTA     | GATCGGAAGAGCTCGTATGCCGCTTTCTGCTTG<br>ACACTCTTCCCTACACGACGCTCTCCGATCT | ACA CAT     |
| P-   | ACT GAA     | GATCGGAAGAGCTCGTATGCCGCTTTCTGCTTG<br>ACACTCTTCCCTACACGACGCTCTCCGATCT | TCA GTT     |
| P-   | CAT GCA     | GATCGGAAGAGCTCGTATGCCGCTTTCTGCTTG<br>ACACTCTTCCCTACACGACGCTCTCCGATCT | GCA TGT     |
| P-   | TTG GTA     | GATCGGAAGAGCTCGTATGCCGCTTTCTGCTTG<br>ACACTCTTCCCTACACGACGCTCTCCGATCT | ACC AAT     |
| P-   | GGG GGA     | GATCGGAAGAGCTCGTATGCCGCTTTCTGCTTG<br>ACACTCTTCCCTACACGACGCTCTCCGATCT | CCC CCT     |
| P-   | CCG GCA     | GATCGGAAGAGCTCGTATGCCGCTTTCTGCTTG<br>ACACTCTTCCCTACACGACGCTCTCCGATCT | GCC GGT     |
| P-   | AAG GAA     | GATCGGAAGAGCTCGTATGCCGCTTTCTGCTTG<br>ACACTCTTCCCTACACGACGCTCTCCGATCT | TCC TTT     |
| P-   | ATC GAA     | GATCGGAAGAGCTCGTATGCCGCTTTCTGCTTG<br>ACACTCTTCCCTACACGACGCTCTCCGATCT | TCG ATT     |
| P-   | CGC GCA     | GATCGGAAGAGCTCGTATGCCGCTTTCTGCTTG<br>ACACTCTTCCCTACACGACGCTCTCCGATCT | GCG CGT     |
| P-   | GCC GGA     | GATCGGAAGAGCTCGTATGCCGCTTTCTGCTTG<br>ACACTCTTCCCTACACGACGCTCTCCGATCT | CCG GCT     |
| P-   | TAC GTA     | GATCGGAAGAGCTCGTATGCCGCTTTCTGCTTG<br>ACACTCTTCCCTACACGACGCTCTCCGATCT | ACG TAT     |
| P-   | CTA GCA     | GATCGGAAGAGCTCGTATGCCGCTTTCTGCTTG<br>ACACTCTTCCCTACACGACGCTCTCCGATCT | GCT AGT     |
| P-   | AGA GAA     | GATCGGAAGAGCTCGTATGCCGCTTTCTGCTTG<br>ACACTCTTCCCTACACGACGCTCTCCGATCT | TCT CTT     |
| P-   | TCA GTA     | GATCGGAAGAGCTCGTATGCCGCTTTCTGCTTG<br>ACACTCTTCCCTACACGACGCTCTCCGATCT | ACT GAT     |
| P-   | GAA GGA     | GATCGGAAGAGCTCGTATGCCGCTTTCTGCTTG<br>ACACTCTTCCCTACACGACGCTCTCCGATCT | CCT TCT     |
| P-   | CTT CCA     | GATCGGAAGAGCTCGTATGCCGCTTTCTGCTTG<br>ACACTCTTCCCTACACGACGCTCTCCGATCT | GGA AGT     |

| Phos | 5'-3' index | Sequence                                                             | 5'-3' index |
|------|-------------|----------------------------------------------------------------------|-------------|
| P-   | AGT CAA     | GATCGGAAGAGCTCGTATGCCGCTTTCTGCTTG<br>ACACTCTTCCCTACACGACGCTCTCCGATCT | TGA CTT     |
| P-   | TCT CTA     | GATCGGAAGAGCTCGTATGCCGCTTTCTGCTTG<br>ACACTCTTCCCTACACGACGCTCTCCGATCT | AGA GAT     |
| P-   | GAT CGA     | GATCGGAAGAGCTCGTATGCCGCTTTCTGCTTG<br>ACACTCTTCCCTACACGACGCTCTCCGATCT | CGA TCT     |
| P-   | ATG CAA     | GATCGGAAGAGCTCGTATGCCGCTTTCTGCTTG<br>ACACTCTTCCCTACACGACGCTCTCCGATCT | TGC ATT     |
| P-   | CGG CCA     | GATCGGAAGAGCTCGTATGCCGCTTTCTGCTTG<br>ACACTCTTCCCTACACGACGCTCTCCGATCT | GGC CGT     |
| P-   | GCG CGA     | GATCGGAAGAGCTCGTATGCCGCTTTCTGCTTG<br>ACACTCTTCCCTACACGACGCTCTCCGATCT | CGC GCT     |
| P-   | TAG CTA     | GATCGGAAGAGCTCGTATGCCGCTTTCTGCTTG<br>ACACTCTTCCCTACACGACGCTCTCCGATCT | AGC TAT     |
| P-   | TTC CTA     | GATCGGAAGAGCTCGTATGCCGCTTTCTGCTTG<br>ACACTCTTCCCTACACGACGCTCTCCGATCT | AGG AAT     |
| P-   | GGC CGA     | GATCGGAAGAGCTCGTATGCCGCTTTCTGCTTG<br>ACACTCTTCCCTACACGACGCTCTCCGATCT | CGG CCT     |
| P-   | CCC CCA     | GATCGGAAGAGCTCGTATGCCGCTTTCTGCTTG<br>ACACTCTTCCCTACACGACGCTCTCCGATCT | GGG GGT     |
| P-   | AAC CAA     | GATCGGAAGAGCTCGTATGCCGCTTTCTGCTTG<br>ACACTCTTCCCTACACGACGCTCTCCGATCT | TGG TTT     |
| P-   | GTA CGA     | GATCGGAAGAGCTCGTATGCCGCTTTCTGCTTG<br>ACACTCTTCCCTACACGACGCTCTCCGATCT | CGT ACT     |
| P-   | TGA CTA     | GATCGGAAGAGCTCGTATGCCGCTTTCTGCTTG<br>ACACTCTTCCCTACACGACGCTCTCCGATCT | AGT CAT     |
| P-   | ACA CAA     | GATCGGAAGAGCTCGTATGCCGCTTTCTGCTTG<br>ACACTCTTCCCTACACGACGCTCTCCGATCT | TGT GTT     |
| P-   | CAA CCA     | GATCGGAAGAGCTCGTATGCCGCTTTCTGCTTG<br>ACACTCTTCCCTACACGACGCTCTCCGATCT | GGT TGT     |

Supplementary Table 3. Full oligonucleotide sequences for indexed adapters.

**Supplementary Table 4.**

| <b>DNA Indexes Appended to Adapter Sequence</b> |         |        |        |
|-------------------------------------------------|---------|--------|--------|
| AAAAAT                                          | CAACCT  | GAAGGT | TAATTT |
| AACCAT                                          | CACACT  | GACTGT | TACGTT |
| AAGGAT                                          | CAGTCT  | GAGAGT | TAGCTT |
| AATTAT                                          | CATGCT  | GATCGT | TATATT |
| ACACAT                                          | CCAACCT | GCATGT | TCAGTT |
| ACCAAT                                          | CCCCCT  | GCCGGT | TCCTTT |
| ACGTAT                                          | CCGGCT  | GCGCGT | TCGATT |
| ACTGAT                                          | CCTTCT  | GCTAGT | TCTCTT |
| AGAGAT                                          | CGATCT  | GGAAGT | TGACTT |
| AGCTAT                                          | CGCGCT  | GGCCGT | TGCATT |
| AGGAAT                                          | CGGCCT  | GGGGGT | TGGTTT |
| AGTCAT                                          | CGTACT  | GGTTGT | TGTGTT |

**Supplementary Table 4.** DNA Indexes Appended to Each Adapter. A total of 48 different 6-mer index sequences were chosen from the 4096 different possible 6-mers. Each index is designed so that the 1<sup>st</sup> and 5<sup>th</sup> base are identical and represent an XOR-based checksum of bases 2-4 so that the index sequence remains identifiable even with an uncalled or low-quality base.

**Supplementary Table 5.**

| Library A dbSNP identifier | log(Ks) | Coverage |
|----------------------------|---------|----------|
| rs12533005                 | 51.1    | 355      |
| rs11167787                 | 74.0    | 713      |
| rs11960262                 | 47.7    | 455      |
| rs11167786                 | 55.7    | 467      |
| rs10210058                 | 18.7    | 452      |
| rs34012                    | 8.1     | 417      |
| rs1042597                  | 4.6     | 297      |
| rs13027376                 | 2.9     | 297      |
| rs13400017                 | 7.9     | 397      |
| rs11167785                 | 48.9    | 528      |
| rs1361963                  | 63.8    | 859      |
| rs6975798                  | 34.1    | 443      |
| rs152524                   | 5.4     | 372      |
| rs1557644                  | 24.0    | 774      |
| rs10791140                 | 55.6    | 1645     |
| rs907676                   | 5.1     | 179      |
| rs11222591                 | 22.7    | 761      |
| rs250108                   | 5.1     | 390      |
| rs1872858                  | 14.1    | 168      |
| rs2237790                  | 31.9    | 686      |
| rs4114768                  | 16.4    | 642      |
| rs11563720                 | 10.0    | 541      |
| rs249926                   | 33.5    | 1514     |
| rs17092980                 | 0.5     | 601      |
| rs4291502                  | 4.0     | 533      |
| rs4528122                  | 23.5    | 58       |
| rs12705964                 | 4.5     | 950      |
| rs7727653                  | 4.4     | 398      |
| rs17099096                 | 3.2     | 362      |
| rs17864670                 | 5.0     | 405      |
| rs9919599                  | 2.4     | 40       |
| rs11955552                 | 4.3     | 825      |
| rs681524                   | 6.9     | 611      |
| rs17864673                 | 13.1    | 1009     |
| rs17868309                 | 4.6     | 815      |
| rs10221563                 | 9.3     | 374      |
| rs11975039                 | 1.2     | 832      |
| rs17099102                 | 1.7     | 709      |
| rs17099100                 | 3.2     | 598      |
| rs7119590                  | 2.1     | 1707     |
| rs10241421                 | -1.7    | 0        |
| rs17099249                 | -1.5    | 17       |
| rs12292614                 | -1.3    | 0        |
| rs1042590                  | -1.7    | 191      |
| rs17867764                 | -1.3    | 0        |
| rs3088078                  | -0.7    | 0        |
| rs11222590                 | -2.5    | 5        |
| rs17863762                 | 0.1     | 0        |
| rs1126806                  | -1.5    | 0        |

| Library B dbSNP | Log(Ks)  | Coverage |
|-----------------|----------|----------|
| rs13289043      | 0        | 0        |
| rs17445742      | 0        | 0        |
| rs17863844      | 0        | 0        |
| rs17437810      | 0.5724   | 1        |
| rs3814492       | 0.3001   | 1        |
| rs17468650      | 0.138    | 2        |
| rs17468601      | -0.0202  | 3        |
| rs17446218      | 4.6375   | 4        |
| rs2229419       | 1.1383   | 4        |
| rs9945664       | -0.3719  | 4        |
| rs17437824      | 1.6533   | 6        |
| rs4291502       | -0.1137  | 6        |
| rs17445496      | -0.1526  | 6        |
| rs17468095      | 1.4706   | 7        |
| rs10988209      | 8.4219   | 15       |
| rs4727223       | 10.3836  | 16       |
| rs3118625       | 6.4789   | 16       |
| rs17428157      | 4.1719   | 16       |
| rs11980022      | 4.8702   | 18       |
| rs7046990       | 14.0197  | 20       |
| rs17862129      | 7.7949   | 20       |
| rs4528122       | 17.9849  | 26       |
| rs3124495       | 7.4348   | 27       |
| rs10988200      | 14.7299  | 29       |
| rs3118639       | 22.777   | 30       |
| rs13020968      | 4.3019   | 40       |
| rs4363925       | 5.6175   | 50       |
| rs17468088      | 20.4266  | 110      |
| rs194537        | 10.06    | 116      |
| rs13418652      | 5.2823   | 137      |
| rs3750340       | 29.9307  | 144      |
| rs7243677       | 8.1997   | 152      |
| rs17446232      | 44.4083  | 170      |
| rs7577157       | 44.4728  | 172      |
| rs4800835       | 24.5798  | 174      |
| rs2302153       | 18.1967  | 212      |
| rs17468102      | 51.1039  | 219      |
| rs7595960       | 58.7743  | 227      |
| rs194536        | 33.8634  | 239      |
| rs9951439       | 50.2121  | 243      |
| rs17463213      | 57.6308  | 260      |
| rs1220155       | 63.2521  | 271      |
| rs512362        | 45.6942  | 272      |
| rs194535        | 69.7629  | 275      |
| rs1220029       | 36.9822  | 278      |
| rs12470426      | 63.5206  | 288      |
| rs11564329      | 63.3966  | 291      |
| rs1530380       | 62.8385  | 291      |
| rs12473889      | 65.888   | 298      |
| rs9646720       | 37.2413  | 343      |
| rs2108809       | 55.3984  | 358      |
| rs4768189       | 44.4388  | 358      |
| rs17463233      | 85.2413  | 367      |
| rs1220154       | 37.9816  | 376      |
| rs7962260       | 64.8659  | 385      |
| rs17468636      | 87.3576  | 392      |
| rs4413048       | 57.5525  | 453      |
| rs17468122      | 120.5659 | 469      |
| rs610906        | 23.2828  | 470      |
| rs1148374       | 53.2736  | 571      |
| rs6508522       | 25.2233  | 583      |
| rs6711120       | 68.73    | 608      |
| rs1220156       | 90.5985  | 678      |

**Supplementary Table 5. Polymorphism coverage and  $K_s$ .** List of SNPs containing known variants, their coverage, and their  $K_s$  in sequenced regions for Library A (left) and Library B (right).

## **Supplementary Methods**

**Amplification of targeted regions.** 46 HapMap individuals were whole genome amplified by RepliG (Qiagen) and the concentration determined by replicate measures using the Quant-iT PicoGreen dsDNA kit (Invitrogen). For each HapMap individual, the ENCODE regions were amplified by long-range PCR in a 25ul reaction volume using 75ng template DNA, 1X PfuUltra Buffer, 2mM dNTPs (total), 400nM each of the forward and reverse primers, and 0.5ul PfuUltra II HS DNA polymerase (Stratagene) per reaction. The thermal cycler conditions were: a denaturation step at 95°C for 2 minutes, 30 cycles consisting of 95°C for 20 seconds, an annealing temperature specific to each primer for 20 seconds, and 68°C for 3 minutes, and a final extension of 68°C for 5 minutes. To generate a sufficient amount of amplicons, the initial PCR products were put through a second PCR reaction. This second-round reaction used 2ul of the initial PCR product, 2mM dNTPs (total), 400nM each of the forward and reverse primers, 1.5ul PfuUltra II HS DNA polymerase (Stratagene), and 1x PfuUltra buffer in a 100ul reaction. The thermal cycler conditions were the same for both the first and second round PCR. Products were purified on QiaQuick 96 well columns (Qiagen) and quantified by taking optical density and Picogreen measurements. A 4-fold range of concentrations was observed after the second round of PCR so the products were titrated such that equimolar amplicons from each individual were pooled and the combined total DNA was ~5µg. Pooled amplicons were digested to 200-300 bp fragments using DNase I enzyme (NEB). Fragmented pools were then blunt end repaired using T4 DNA Polymerase, DNA polymerase I Klenow fragment, and T4 polynucleotide kinase enzyme (NEB). Subsequently, dATP incorporation was performed to the blunt ended amplicons with Klenow Fragment 3'-5' exo minus enzyme (NEB). DNA was purified after each step using Illumina-recommended Qiagen 96 well purification columns.

**Indexing adapter preparation.** A total of 48 different adapters were produced to index sequenced fragments (See supplementary tables 2-6). The adapter sequence began with the oligonucleotide sequences provided by, and shared with the permission of, Illumina, (© 2006 Illumina, Inc.; 5' P-GATCGGAAGAGCTCGTATGCCGTCTTCTGCTTG and 5' ACACTCTTCCCTACACGACGCTCTTCCGATCT) and were followed by the index in the forward and reverse directions respectively. Lyophilized, indexed adapters were dissolved in 10mM Tris-HCl pH 7.8 (Sigma) to a 100uM stock concentration. A 10X annealing buffer was made containing 100mM Tris-HCl pH 7.8 and 0.5M NaCl (Gibco). Indexed adapter pairs were combined to a 50uM final concentration with 10X annealing buffer for a final concentration of 1X. Subsequently, a step down annealing reaction was performed, where the indexed adapter mix was incubated at 95°C for 2 minutes followed by a series of cooling steps of 1°C per minute from 95°C to 25°C.

**Adapter ligation, PCR enrichment and sequencing of indexed amplicons.** A unique indexed-adapter sequence was ligated to each HapMap individuals' adenylated amplicon pool. Ligation was performed at 20°C for 2 hours followed by 16°C for 16 hours using T4 DNA ligase enzyme (NEB). Ligated amplicons were then pooled for all individuals to be sequenced on the same flow cell lane. The pooled ligated amplicons (referred to as a library) were loaded onto a 4% agarose gel and 150-200 bp fragments were gel-purified using Qiagen gel purification columns. Libraries were PCR-enriched using Phusion DNA polymerase PCR mix and adapter compatible primers 1.1 and 2.1 (Illumina). Each PCR product was loaded onto a 4% agarose gel and fragments of 150-200bp were gel-purified using Qiagen gel purification columns. Each library was quantified using Nanodrop ND-1000 and diluted to 10nM working concentration using EB buffer. Each library was loaded on a lane of the flowcell for cluster generation and libraries were sequenced on an Illumina GA. Initial cluster counts typically ranged from 1M to 2M clusters per flow cell lane. In later runs, cluster counts of approximately 8-10M clusters per



flow cell lane were typically observed during indexed sequencing. Also in later runs (not shown), we found that the same indexing strategy of ligating barcoded adapters was effective in paired-end sequencing on the Genome Analyzer II upgraded system. In these runs, 5-base indexes were utilized. With 5-base paired-end indexing runs, indexes from both the forward and reverse reads are sequenced for a total of 10 indexed bases.

**Calculation of false-positives.** False negative rates were determined by calculating if a base known to be polymorphic in our library of HapMap individuals reached previously specified  $K_s$  thresholds. Within Library A, 152 SNPs were listed in dbSNP. Of these SNPs, 50 SNPs have at least one individual varying in genotype from the other sequenced individuals. We observed 41 of the 50 SNPs had a base-level  $K_s > 10$ , with 40 of 41 exceeding  $K_B > 100$ . Of the 9 false-negative SNP positions, 1 SNP was triallelic and not entirely compatible with our biallelic analysis model, 1 SNP was found only in 2 individuals and the other 7 SNPs were found in only 1 individual. Similar results were obtained for Library B (table 1). The false negatives appear to result from lack of coverage (figure 5a) and not simply because only 1 individual had the variant: of the 7 single-event false negatives, 3 individuals had less than 2 reads at the variant position. False positives are more difficult to quantify since not all polymorphic sites are known, even in previously resequenced regions. In our analysis, to be defined as a false positive, the base must reach a pre-specified  $K_s$ , must not exactly match the location of variants within dbSNP, and must not have trace sequencing data indicating a missed variant. Library B, which is entirely composed of regions with existing ENCODE sequencing data, was used to specifically estimate false-positives (table 1). Immediately evident by visual inspection (Figure 4) is an overall low false positive rate for bases with large  $K_s$  values; most high-ranking bases ( $K_s > 100$ ) are also listed in dbSNP (see Figure 4a). Particularly within the two ENCODE sequenced regions, 25 of the top 25 ranked bases were at the exact position of the SNP. In previously non-sequenced regions, we could identify many candidate variants. For instance, in region 2, there were 20 bases with  $K_s > 3$ . For the 8 highest ranking bases, 4 were unambiguously confirmed as novel SNPs. Of the remaining 4 bases, 1 did not have sufficient trace data, 1 was neighboring an identified SNP and neighboring a repeat region, 1 was in a repeat region, and 2 were in regions highly homologous to other regions in the genome. For the remaining 12 high-ranking bases, we were not able to confirm the existence of a SNP. For these bases, trace data frequently exhibited multiple reads, was poor in quality in both read directions, or was within a location with high sequence homology (see examples of difficult-to-assess traces in Figure 4d and 4e). In some cases, high quality sequence data was not available for the exact individuals driving the ranking. However, it is likely that these 12 unconfirmed candidate variants are false-positives and we treat them as such for our analysis. Indeed, the most prominent source of false positives with our approach appears to arise from homology to other regions or polymorphic sites elsewhere in the genome. In practice, one would expect lower false positive rates for less complex regions.
